# Supplementary material for: Evaluating Water and Carbon Retention in a Low-Order, Designed River Corridor
Source: MDPI journal article supplement (doi:10.3390/land11122256), 2022-12-10
Supplement: s1 [file land-2082822-supplementary.pdf › land-2082822-supplementary.pdf]

## Supplementary Material

Total daily rainfall, water temperature and level over the 2019 and 2020 field seasons.

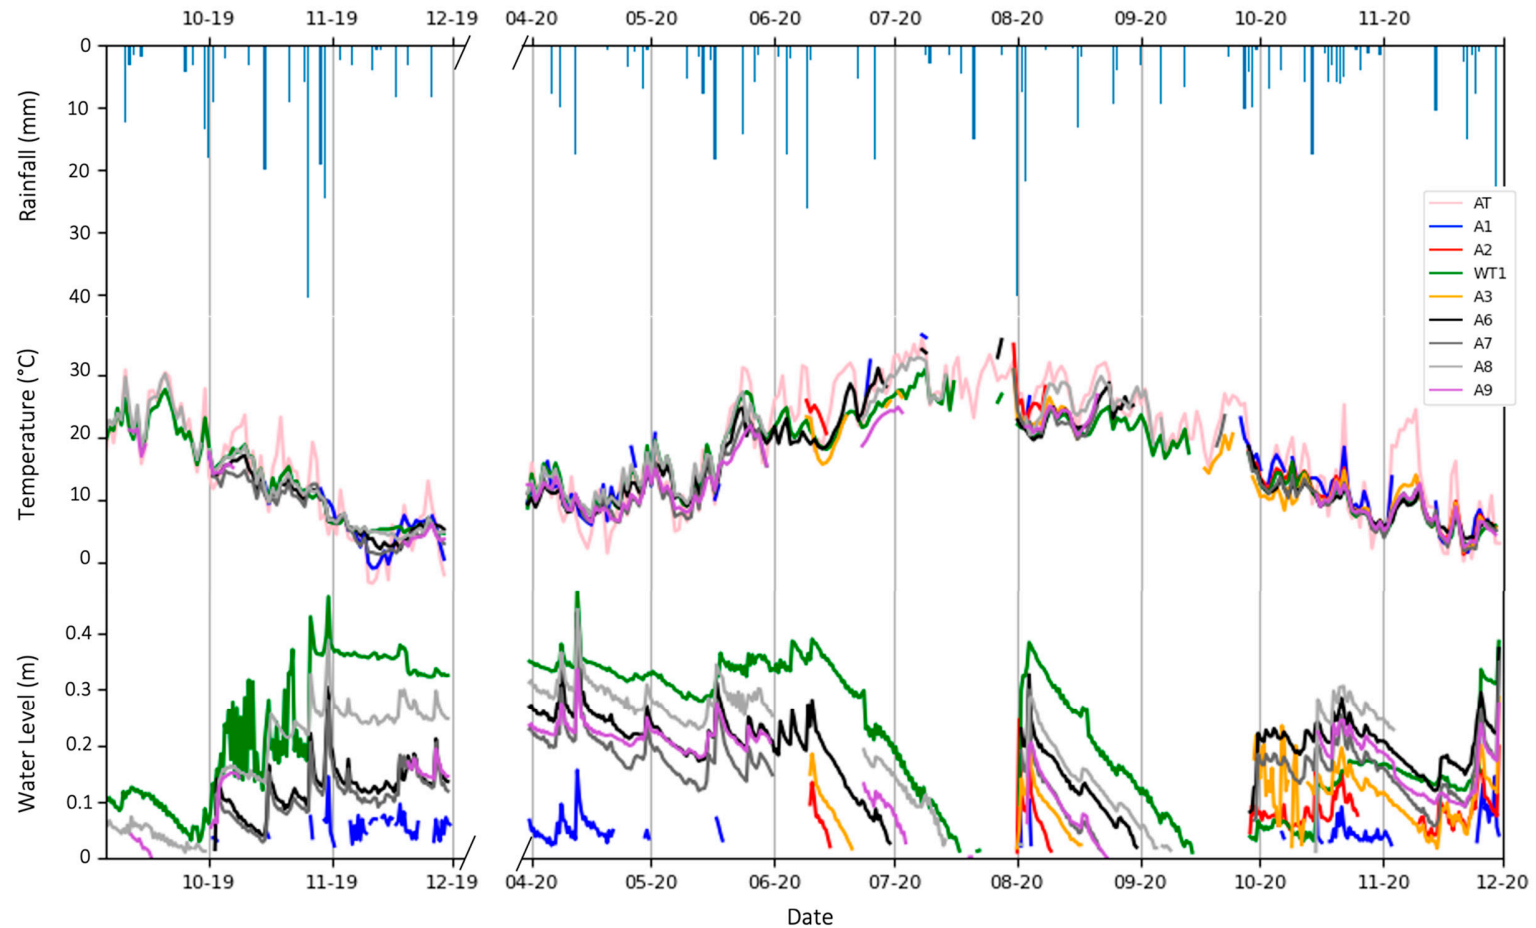

Supplementary Material Figure S1: Total daily rainfall at the field site (top), temperature at each surface water monitoring station and AT as measured at 1600h each day (middle), and water level at each surface water monitoring station as measured at 1000h and 1600h each day (bottom).
